# Supplementary material
Source: ML conference proceedings conference paper supplement (https://proceedings.mlr.press/v215/skau23a.html)
Supplement: Supplementary file 1 [file skau23a-supp.pdf]

## Supplementary Material for "Open World Dempster-Shafer Using Complementary Sets"

**Theorem 4** Let  $m_1$  and  $m_2$  be CBPAs with frame of discernments  $\Omega_1$  and  $\Omega_2$  respectively. For a new frame of discernment  $\Omega$ , the evaluation distributes through the conjunctive join,

$$m_1|_{\Omega} \oplus m_2|_{\Omega} = (m_1 \oplus m_2)|_{\Omega} .$$

**Proof** Proven directly.

For  $w \in 2^{\Omega}$ :

$$\begin{aligned}
 (m_1|_{\Omega} \oplus m_2|_{\Omega})(w) &= \sum_{\substack{u \in 2^{\Omega} \\ v \in 2^{\Omega} \\ u \cap v = w}} m_1|_{\Omega}(u) \cdot m_2|_{\Omega}(v) && \text{(by conjunctive join definition)} \\
 &= \sum_{\substack{u \in 2^{\Omega} \\ v \in 2^{\Omega} \\ u \cap v = w}} \left( \sum_{\substack{x \in 2^{\Omega_1} \times \mathbb{B} \\ x|_{\Omega} = u}} m_1(x) \right) \cdot \left( \sum_{\substack{y \in 2^{\Omega_2} \times \mathbb{B} \\ y|_{\Omega} = v}} m_2(y) \right) && \text{(by evaluation of CBPAs Equation (4))} \\
 &= \sum_{\substack{u \in 2^{\Omega} \\ v \in 2^{\Omega} \\ u \cap v = w}} \left( \sum_{\substack{q \in 2^{\Omega_1} \\ (q, T)|_{\Omega} = u}} m_1((q, T)) + \sum_{\substack{r \in 2^{\Omega_1} \\ (r, F)|_{\Omega} = u}} m_1((r, F)) \right) \cdot \left( \sum_{\substack{s \in 2^{\Omega_2} \\ (s, T)|_{\Omega} = v}} m_2((s, T)) + \sum_{\substack{t \in 2^{\Omega_2} \\ (t, F)|_{\Omega} = v}} m_2((t, F)) \right) && \text{(by splitting complementary focal elements into } T \text{ and } F \text{ components)} \\
 &= \sum_{\substack{u \in 2^{\Omega} \\ v \in 2^{\Omega} \\ u \cap v = w}} \left( \sum_{\substack{q \in 2^{\Omega_1} \\ \Omega \cap q = u}} m_1((q, T)) + \sum_{\substack{r \in 2^{\Omega_1} \\ \Omega - r = u}} m_1((r, F)) \right) \cdot \left( \sum_{\substack{s \in 2^{\Omega_2} \\ \Omega \cap s = v}} m_2((s, T)) + \sum_{\substack{t \in 2^{\Omega_2} \\ \Omega - t = v}} m_2((t, F)) \right) && \text{(by evaluation of complementary focal elements Equation (3))} \\
 &= \sum_{\substack{u \in 2^{\Omega} \\ v \in 2^{\Omega} \\ u \cap v = w}} \left( \sum_{\substack{q \in 2^{\Omega_1} \\ \Omega \cap q = u}} m_1((q, T)) \cdot \sum_{\substack{s \in 2^{\Omega_2} \\ \Omega \cap s = v}} m_2((s, T)) + \sum_{\substack{q \in 2^{\Omega_1} \\ \Omega \cap q = u}} m_1((q, T)) \cdot \sum_{\substack{t \in 2^{\Omega_2} \\ \Omega - t = v}} m_2((t, F)) \right) \\
 &\quad + \sum_{\substack{r \in 2^{\Omega_1} \\ \Omega - r = u}} m_1((r, F)) \cdot \sum_{\substack{s \in 2^{\Omega_2} \\ \Omega \cap s = v}} m_2((s, T)) + \sum_{\substack{r \in 2^{\Omega_1} \\ \Omega - r = u}} m_1((r, F)) \cdot \sum_{\substack{t \in 2^{\Omega_2} \\ \Omega - t = v}} m_2((t, F)) && \text{(by distributive expansion of a product of sums)} \\
 &= \sum_{\substack{q \in 2^{\Omega_1} \\ s \in 2^{\Omega_2} \\ (\Omega \cap q) \cap (\Omega \cap s) = w}} m_1((q, T)) \cdot m_2((s, T)) + \sum_{\substack{q \in 2^{\Omega_1} \\ t \in 2^{\Omega_2} \\ (\Omega \cap q) \cap (\Omega - t) = w}} m_1((q, T)) \cdot m_2((t, F)) \\
 &\quad + \sum_{\substack{r \in 2^{\Omega_1} \\ s \in 2^{\Omega_2} \\ (\Omega - r) \cap (\Omega \cap s) = w}} m_1((r, F)) \cdot m_2((s, T)) + \sum_{\substack{r \in 2^{\Omega_1} \\ t \in 2^{\Omega_2} \\ (\Omega - r) \cap (\Omega - t) = w}} m_1((r, F)) \cdot m_2((t, F)) && \text{(by substitution)}
 \end{aligned}$$

$$\begin{aligned}
&= \sum_{\substack{q \in 2^{\Omega_1} \\ s \in 2^{\Omega_2} \\ \Omega \cap (q \cap s) = w}} m_1((q, T)) \cdot m_2((s, T)) + \sum_{\substack{q \in 2^{\Omega_1} \\ t \in 2^{\Omega_2} \\ \Omega \cap (q - t) = w}} m_1((q, T)) \cdot m_2((t, F)) \\
&+ \sum_{\substack{r \in 2^{\Omega_1} \\ s \in 2^{\Omega_2} \\ \Omega \cap (s - r) = w}} m_1((r, F)) \cdot m_2((s, T)) + \sum_{\substack{r \in 2^{\Omega_1} \\ t \in 2^{\Omega_2} \\ \Omega - (r \cup t) = w}} m_1((r, F)) \cdot m_2((t, F)) \quad (\text{by set theory}) \\
&= \sum_{\substack{q \in 2^{\Omega_1} \\ s \in 2^{\Omega_2} \\ (q \cap s, T)|_{\Omega} = w}} m_1((q, T)) \cdot m_2((s, T)) + \sum_{\substack{q \in 2^{\Omega_1} \\ t \in 2^{\Omega_2} \\ (q - t, T)|_{\Omega} = w}} m_1((q, T)) \cdot m_2((t, F)) \\
&+ \sum_{\substack{r \in 2^{\Omega_1} \\ s \in 2^{\Omega_2} \\ (s - r, T)|_{\Omega} = w}} m_1((r, F)) \cdot m_2((s, T)) + \sum_{\substack{r \in 2^{\Omega_1} \\ t \in 2^{\Omega_2} \\ (r \cup t, F)|_{\Omega} = w}} m_1((r, F)) \cdot m_2((t, F)) \\
&\quad (\text{by evaluation of complementary focal elements Equation (3)}) \\
&= \sum_{\substack{q \in 2^{\Omega_1} \\ s \in 2^{\Omega_2} \\ ((q, T) \cap (s, T))|_{\Omega} = w}} m_1((q, T)) \cdot m_2((s, T)) + \sum_{\substack{q \in 2^{\Omega_1} \\ t \in 2^{\Omega_2} \\ ((q, T) \cap (t, F))|_{\Omega} = w}} m_1((q, T)) \cdot m_2((t, F)) \\
&+ \sum_{\substack{r \in 2^{\Omega_1} \\ s \in 2^{\Omega_2} \\ ((s, T) \cap (r, F))|_{\Omega} = w}} m_1((r, F)) \cdot m_2((s, T)) + \sum_{\substack{r \in 2^{\Omega_1} \\ t \in 2^{\Omega_2} \\ ((r, F) \cap (t, F))|_{\Omega} = w}} m_1((r, F)) \cdot m_2((t, F)) \\
&\quad (\text{by intersection identities Equation (6)}) \\
&= \sum_{\substack{x \in 2^{\Omega_1} \times \mathbb{B} \\ y \in 2^{\Omega_2} \times \mathbb{B} \\ (x \cap y)|_{\Omega} = w}} m_1(x) \cdot m_2(y) \\
&\quad (\text{by contracting } T \text{ and } F \text{ components into complementary focal elements}) \\
&= \sum_{\substack{z \in 2^{\Omega_1 \cup \Omega_2} \times \mathbb{B} \\ z|_{\Omega} = w}} \sum_{\substack{x \in 2^{\Omega_1} \times \mathbb{B} \\ y \in 2^{\Omega_2} \times \mathbb{B} \\ (x \cap y) = z}} m_1(x) \cdot m_2(y) \quad (\text{by substitution}) \\
&= \sum_{\substack{z \in 2^{\Omega_1 \cup \Omega_2} \times \mathbb{B} \\ z|_{\Omega} = w}} (m_1 \oplus m_2)(z) \quad (\text{by conjunctive join Definition 3}) \\
&= (m_1 \oplus m_2)|_{\Omega}(w) \quad (\text{by evaluation of CBPA's Equation (4)})
\end{aligned}$$

■

**Theorem 6** For a CBPA  $m$  with a frame of discernment  $\Omega$  and for  $u \in 2^{\Omega}$ ,

$$\text{bel}_m((u, T)) \leq \text{bel}_{m|_{\Omega}}(u) \leq \text{bel}_m((\Omega - u, F)).$$

**Proof** Done directly as two inequalities.

$$\begin{aligned}
\text{bel}_m((u, T)) &= \sum_{\substack{x \in 2^{\Omega} \times \mathbb{B} \\ x \subseteq (u, T) \\ x \neq (\emptyset, T)}} m(x) \quad (\text{by belief Definition 5}) \\
&= \sum_{\substack{v \in 2^{\Omega} \\ (v, T) \subseteq (u, T) \\ (v, T) \neq (\emptyset, T)}} m((v, T)) + \sum_{\substack{v \in 2^{\Omega} \\ (v, F) \subseteq (u, T) \\ (v, F) \neq (\emptyset, T)}} m((v, F)) \\
&\quad (\text{by splitting complementary focal elements into } T \text{ and } F \text{ components})
\end{aligned}$$

$$\begin{aligned}
 &= \sum_{\substack{v \in 2^\Omega \\ v \subseteq u \\ v \neq \emptyset}} m((v, T)) && \text{(by subset identities Equation (10))} \\
 &\leq \sum_{\substack{v \in 2^\Omega \\ v \subseteq u \\ v \neq \emptyset}} (m((v, T)) + m((\Omega - v, F))) && \text{(by adding additional components)} \\
 &= \sum_{\substack{v \in 2^\Omega \\ v \subseteq u \\ v \neq \emptyset}} m|_\Omega(v) && \text{(by evaluation identity Equation (5))} \\
 &= \text{bel}_{m|_\Omega}(u) && \text{(by belief definition)} \\
 \\
 \text{bel}_{m|_\Omega}(u) &= \sum_{\substack{v \in 2^\Omega \\ v \subseteq u \\ v \neq \emptyset}} m|_\Omega(v) && \text{(by belief definition)} \\
 &= \sum_{\substack{v \in 2^\Omega \\ v \subseteq u \\ v \neq \emptyset}} (m((v, T)) + m((\Omega - v, F))) && \text{(by evaluation identity Equation (5))} \\
 &= \sum_{\substack{v \in 2^\Omega \\ v \subseteq u \\ v \neq \emptyset}} m((v, T)) + \sum_{\substack{v \in 2^\Omega \\ v \subseteq u \\ v \neq \emptyset}} m((\Omega - v, F)) && \text{(by distributive property)} \\
 &= \sum_{\substack{v \in 2^\Omega \\ v \cap (\Omega - u) = \emptyset \\ v \neq \emptyset}} m((v, T)) + \sum_{\substack{v \in 2^\Omega \\ \Omega - u \subseteq \Omega - v \\ v \neq \emptyset}} m((\Omega - v, F)) && \text{(by set theory)} \\
 &\leq \sum_{\substack{v \in 2^\Omega \\ v \cap (\Omega - u) = \emptyset \\ v \neq \emptyset}} m((v, T)) + \sum_{\substack{v \in 2^\Omega \\ \Omega - u \subseteq \Omega - v}} m((\Omega - v, F)) && \text{(by adding additional components)} \\
 &= \sum_{\substack{v \in 2^\Omega \\ v \cap (\Omega - u) = \emptyset \\ v \neq \emptyset}} m((v, T)) + \sum_{\substack{y \in 2^\Omega \\ \Omega - u \subseteq y}} m((y, F)) && \text{(change of variables, } y = \Omega - v) \\
 &= \sum_{\substack{x \in 2^\Omega \times \mathbb{B} \\ x \subseteq (\Omega - u, F) \\ x \neq (\emptyset, T)}} m(x) && \text{(by contracting } T \text{ and } F \text{ components into complementary focal elements)} \\
 &= \text{bel}_m((\Omega - u, F)) && \text{(by belief Definition 5)}
 \end{aligned}$$

■

**Theorem 8** For a CBPA  $m$  with a frame of discernment  $\Omega$  and for  $u \in 2^\Omega$ ,

$$\text{pl}_m((u, T)) = \text{pl}_{m|_\Omega}(u) \leq \text{pl}_m((\Omega - u, F)).$$

**Proof** Done directly in two steps.

$$\begin{aligned}
 \text{pl}_m((u, T)) &= \sum_{\substack{x \in 2^\Omega \times \mathbb{B} \\ x \cap (u, T) \neq (\emptyset, T)}} m(x) && \text{(by plausibility Definition 7)} \\
 &= \sum_{\substack{v \in 2^\Omega \\ (v, T) \cap (u, T) \neq (\emptyset, T)}} m((v, T)) + \sum_{\substack{v \in 2^\Omega \\ (v, F) \cap (u, T) \neq (\emptyset, T)}} m((v, F)) \\
 &&& \text{(by splitting complementary focal elements into } T \text{ and } F \text{ components)}
 \end{aligned}$$

$$\begin{aligned}
&= \sum_{\substack{v \in 2^\Omega \\ v \cap u \neq \emptyset}} m((v, T)) + \sum_{\substack{v \in 2^\Omega \\ u-v \neq \emptyset}} m((v, F)) && \text{(by intersection identities Equation (6))} \\
&= \sum_{\substack{v \in 2^\Omega \\ \Omega \cap v \cap u \neq \emptyset}} m((v, T)) + \sum_{\substack{v \in 2^\Omega \\ (\Omega-v) \cap u \neq \emptyset}} m((v, F)) && \text{(by set theory)} \\
&= \sum_{\substack{w \in 2^\Omega \\ w \cap u \neq \emptyset}} \left( \sum_{\substack{v \in 2^\Omega \\ \Omega \cap v = w}} m((v, T)) + \sum_{\substack{v \in 2^\Omega \\ \Omega-v = w}} m((v, F)) \right) && \text{(by algebra)} \\
&= \sum_{\substack{w \in 2^\Omega \\ w \cap u \neq \emptyset}} \left( \sum_{(v, T)|_\Omega = w} m((v, T)) + \sum_{(v, F)|_\Omega = w} m((v, F)) \right) && \text{(by evaluation of complementary focal elements Equation (3))} \\
&= \sum_{\substack{w \in 2^\Omega \\ w \cap u \neq \emptyset}} \sum_{\substack{x \in 2^\Omega \times \mathbb{B} \\ x|_\Omega = w}} m(x) && \text{(by contracting } T \text{ and } F \text{ components into complementary focal elements)} \\
&= \sum_{\substack{w \in 2^\Omega \\ w \cap u \neq \emptyset}} m|_\Omega(w) && \text{(by evaluation of CBPA's Equation (4))} \\
&= \text{pl}_{m|_\Omega}(u) && \text{(by plausibility definition)}
\end{aligned}$$

With the first equality  $\text{pl}_m((u, T)) = \text{pl}_{m|_\Omega}(u)$  shown to be true, we now prove  $\text{pl}_m((u, T)) \leq \text{pl}_m((\Omega - u, F))$ .

$$\begin{aligned}
\text{pl}_m((u, T)) &= \sum_{\substack{x \in 2^\Omega \times \mathbb{B} \\ x \cap (u, T) \neq (\emptyset, T)}} m(x) && \text{(by plausibility Definition 7)} \\
&= \sum_{\substack{v \in 2^\Omega \\ (v, T) \cap (u, T) \neq (\emptyset, T)}} m((v, T)) + \sum_{\substack{v \in 2^\Omega \\ (v, F) \cap (u, T) \neq (\emptyset, T)}} m((v, F)) && \text{(by splitting complementary focal elements into } T \text{ and } F \text{ components)} \\
&= \sum_{\substack{v \in 2^\Omega \\ v \cap u \neq \emptyset}} m((v, T)) + \sum_{\substack{v \in 2^\Omega \\ u-v \neq \emptyset}} m((v, F)) && \text{(by intersection identities Equation (6))} \\
&\leq \sum_{\substack{v \in 2^\Omega \\ v \cap u \neq \emptyset}} m((v, T)) + \sum_{v \in 2^\Omega} m((v, F)) && \text{(by adding additional components)} \\
&= \sum_{\substack{v \in 2^\Omega \\ v - (\Omega - u) \neq \emptyset}} m((v, T)) + \sum_{v \in 2^\Omega} m((v, F)) && \text{(by set theory)} \\
&= \sum_{\substack{v \in 2^\Omega \\ (v, T) \cap (\Omega - u, F) \neq (\emptyset, T)}} m((v, T)) + \sum_{\substack{v \in 2^\Omega \\ (v, F) \cap (\Omega - u, F) \neq (\emptyset, T)}} m((v, F)) && \text{(by intersection identities Equation (6))} \\
&= \sum_{\substack{x \in 2^\Omega \times \mathbb{B} \\ x \cap (\Omega - u, F) \neq (\emptyset, T)}} m(x) && \text{(by contracting } T \text{ and } F \text{ components into complementary focal elements)} \\
&= \text{pl}_m((\Omega - u, F)) && \text{(by plausibility Definition 7)}
\end{aligned}$$

**Theorem 9** *Belief and plausibility are related through the following equation:*

$$m((\emptyset, T)) + \text{bel}((u, \neg a)) + \text{pl}((u, a)) = 1 \quad (1)$$

**Proof** We prove this by breaking it up into two cases and expanding.

Case 1:  $a = T$

$$\begin{aligned}
 & m((\emptyset, T)) + \text{bel}((u, F) + \text{pl}((u, T)) \\
 &= m((\emptyset, T)) + \sum_{\substack{x \in 2^\Omega \times \mathbb{B} \\ x \subseteq (u, F) \\ x \neq (\emptyset, T)}} m(x) + \sum_{\substack{x \in 2^\Omega \times \mathbb{B} \\ x \cap (u, T) \neq (\emptyset, T)}} m(x) && \text{(by belief and plausibility Definitions 5 and 7)} \\
 &= \sum_{\substack{x \in 2^\Omega \times \mathbb{B} \\ x \subseteq (u, F)}} m(x) + \sum_{\substack{x \in 2^\Omega \times \mathbb{B} \\ x \cap (u, T) \neq (\emptyset, T)}} m(x) && \text{(by grouping the first two terms together)} \\
 &= \sum_{\substack{v \in 2^\Omega \\ (v, T) \subseteq (u, F)}} m((v, T)) + \sum_{\substack{v \in 2^\Omega \\ (v, F) \subseteq (u, F)}} m((v, F)) + \sum_{\substack{v \in 2^\Omega \\ (v, T) \cap (u, T) \neq (\emptyset, T)}} m((v, T)) + \sum_{\substack{v \in 2^\Omega \\ (v, F) \cap (u, T) \neq (\emptyset, T)}} m((v, F)) \\
 &&& \text{(by splitting complementary focal elements into } T \text{ and } F \text{ components)} \\
 &= \sum_{\substack{v \in 2^\Omega \\ v \cap u = \emptyset}} m((v, T)) + \sum_{\substack{v \in 2^\Omega \\ u \subseteq v}} m((v, F)) + \sum_{\substack{v \in 2^\Omega \\ u \cap v \neq \emptyset}} m((v, T)) + \sum_{\substack{v \in 2^\Omega \\ u - v \neq \emptyset}} m((v, F)) \\
 &&& \text{(by applying intersection and subset Equations (6) and (10))} \\
 &= \sum_{v \in 2^\Omega} m((v, T)) + \sum_{v \in 2^\Omega} m((v, F)) && \text{(by grouping like terms, } m((v, T)) \text{ together and } m((v, F)) \text{ together)} \\
 &= \sum_{x \in 2^\Omega \times \mathbb{B}} m(x) && \text{(by contracting } T \text{ and } F \text{ components into complementary focal elements)} \\
 &= 1 && \text{(by CBPA Definition 2)}
 \end{aligned}$$

Case 2:  $a = F$

$$\begin{aligned}
 & m((\emptyset, T)) + \text{bel}((u, T) + \text{pl}((u, F)) \\
 &= m((\emptyset, T)) + \sum_{\substack{x \in 2^\Omega \times \mathbb{B} \\ x \subseteq (u, T) \\ x \neq (\emptyset, T)}} m(x) + \sum_{\substack{x \in 2^\Omega \times \mathbb{B} \\ x \cap (u, F) \neq (\emptyset, T)}} m(x) && \text{(by belief and plausibility Definitions 5 and 7)} \\
 &= \sum_{\substack{x \in 2^\Omega \times \mathbb{B} \\ x \subseteq (u, T)}} m(x) + \sum_{\substack{x \in 2^\Omega \times \mathbb{B} \\ x \cap (u, F) \neq (\emptyset, T)}} m(x) && \text{(by grouping the first two terms together)} \\
 &= \sum_{\substack{v \in 2^\Omega \\ (v, T) \subseteq (u, T)}} m((v, T)) + \sum_{\substack{v \in 2^\Omega \\ (v, F) \subseteq (u, T)}} m((v, F)) + \sum_{\substack{v \in 2^\Omega \\ (v, T) \cap (u, F) \neq (\emptyset, T)}} m((v, T)) + \sum_{\substack{v \in 2^\Omega \\ (v, F) \cap (u, F) \neq (\emptyset, T)}} m((v, F)) \\
 &&& \text{(by splitting complementary focal elements into } T \text{ and } F \text{ components)} \\
 &= \sum_{\substack{v \in 2^\Omega \\ v \subseteq u}} m((v, T)) + \sum_{\substack{v \in 2^\Omega \\ v - u \neq \emptyset}} m((v, T)) + \sum_{v \in 2^\Omega} m((v, F)) \\
 &&& \text{(by applying intersection and subset Equations (6) and (10))} \\
 &= \sum_{v \in 2^\Omega} m((v, T)) + \sum_{v \in 2^\Omega} m((v, F)) && \text{(by grouping like terms, } m((v, T)) \text{ together)} \\
 &= \sum_{x \in 2^\Omega \times \mathbb{B}} m(x) && \text{(by contracting } T \text{ and } F \text{ components into complementary focal elements)} \\
 &= 1 && \text{(by CBPA Definition 2)}
 \end{aligned}$$

■
